# Supplementary material
Source: PubMed Central journal article supplement (PMC4978536)
Supplement: NIHMS4366-supplement-1.pdf [file NIHMS4366-supplement-1.pdf]

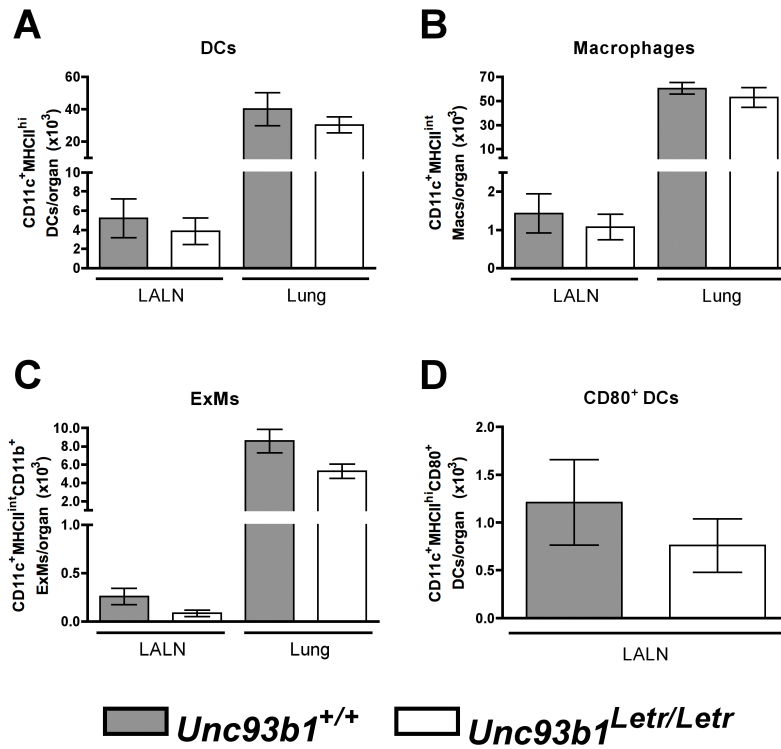

**Supplementary Figure 1: Equivalent number of APCs in LALNs and lungs of *Unc93b1*<sup>+/+</sup> and *Unc93b1*<sup>Letr/Letr</sup> mice at day 3 post-infection.** Absolute number of LALN and lung (A) CD11c<sup>+</sup>MHCII<sup>hi</sup> DCs, (B) CD11c<sup>+</sup>MHCII<sup>int</sup> macrophages, (C) CD11c<sup>+</sup>MHCII<sup>int</sup>CD11b<sup>+</sup> ExMs in *Unc93b1*<sup>+/+</sup> (grey bars) and *Unc93b1*<sup>Letr/Letr</sup> (white bars) mice. (D) Absolute number of CD80<sup>+</sup> DCs in the LALNs of *Unc93b1*<sup>+/+</sup> and *Unc93b1*<sup>Letr/Letr</sup> mice. Data is representative of two independent experiments (n=6/group).

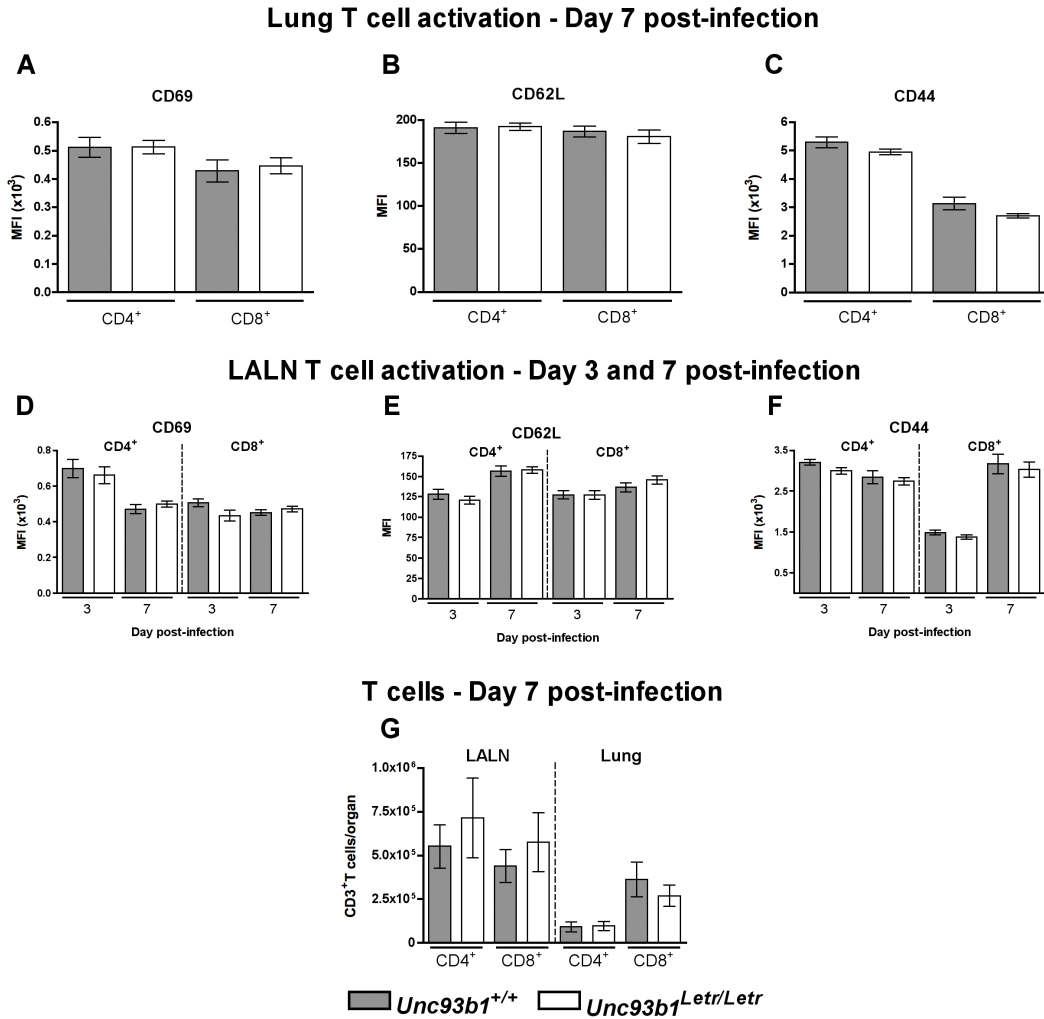

**Supplementary Figure 2: Similar activation of T cells in the lungs at day 7 and the LALNs at day 3 and day 7 post-infection between *Unc93b1*<sup>+/+</sup> and *Unc93b1*<sup>Letr/Letr</sup> mice.** Expression of (A) CD69, (B) CD62L, and (C) CD44 activation markers on lung CD4<sup>+</sup> and CD8<sup>+</sup> T cells at day 7 post-infection from *Unc93b1*<sup>+/+</sup> (grey bars) and *Unc93b1*<sup>Letr/Letr</sup> (white bars) mice. Expression of (D) CD69, (E) CD62L, and (F) CD44 activation markers on LALN CD4<sup>+</sup> and CD8<sup>+</sup> T cells at day 3 and 7 post-infection. (G) Absolute number of CD4<sup>+</sup> and CD8<sup>+</sup> T cells in the LALNs and lungs at day 7 post-infection. Data is representative of two independent experiments (n=5-6/group).

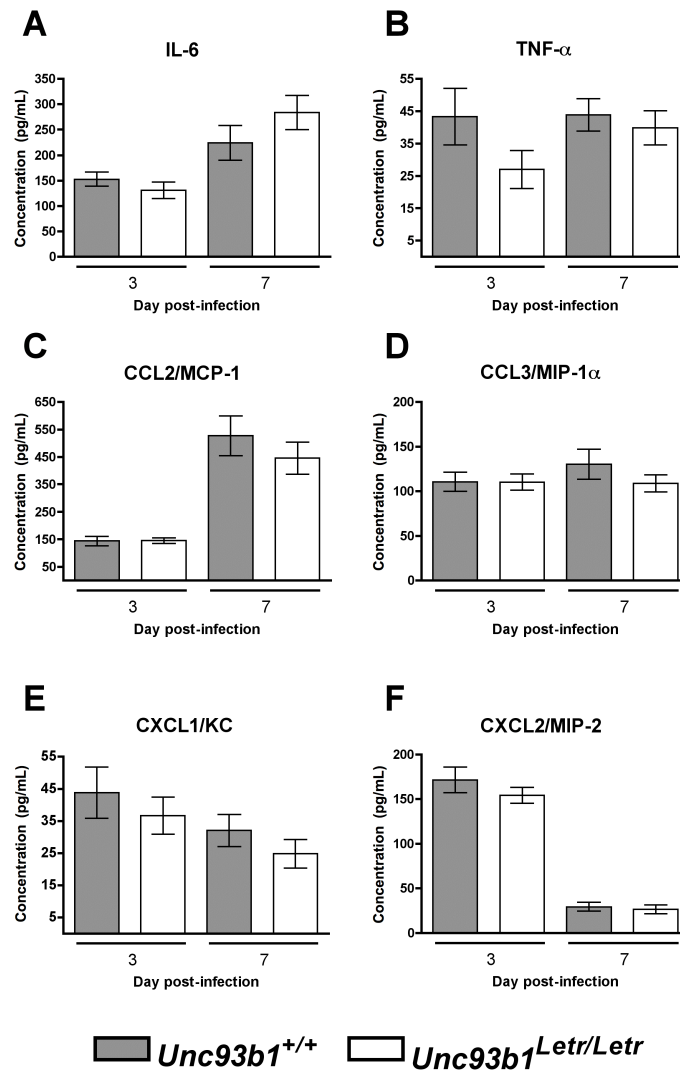

**Supplementary Figure 3: Comparable proinflammatory cytokine and chemokine expression in the airways of *Unc93b1*<sup>+/+</sup> and *Unc93b1*<sup>Letr/Letr</sup> mice.** (A) IL-6, (B) TNF- $\alpha$ , (C) CCL2, (D) CCL3, (E) CXCL1, and (F) CXCL2 expression in the *Unc93b1*<sup>+/+</sup> (grey bars) and *Unc93b1*<sup>Letr/Letr</sup> (white bars) airway at day 3 and 7 post-infection. Data is pooled from two independent experiments (n $\geq$ 9/group).
